# Supplementary material for: Dissection of AT-Hook Motif Nuclear-Localized Genes and Their Potential Functions in Peach Growth and Development
Source: MDPI journal article supplement (doi:10.3390/f14071404), 2023-07-10
Supplement: s1 [file s1]

|                  | 1                               | 10                                           | 20      | 30 |
|------------------|---------------------------------|----------------------------------------------|---------|----|
| Prupe.2G147000.1 | MDP.....                        | VAAHGRPLPPPFLSRDLHLHPHHQFQHHLHNNHN           |         |    |
| Prupe.2G108200.1 | MAG.....                        | LDLGSASRFVHQQLQIPDLHL.....                   | QRPPD   |    |
| Prupe.2G239000.1 | MANRWWAGNVAMGGGHVDSISSTP.....   | PSLHL.....                                   | RNTEE   |    |
| Prupe.8G182400.1 | MSG.....                        |                                              |         |    |
| Prupe.6G348200.1 | MANRWWAGQVGLPGGVNETSAAATNSPMKNI | IKPDLGI.....                                 |         |    |
| Prupe.4G266900.1 | MAA.....                        |                                              |         |    |
| Prupe.5G037400.1 | MAG.....                        | LDLGSAPRYVH.QLHRQDLHL.....                   | QQQQQTD |    |
| Prupe.5G082200.1 | MDT.....                        | HSLPPPFHTRDFHLQHHPQF...HHQQQQN               |         |    |
| Prupe.5G004600.1 | MAG.....                        | YNESLSTTSAPTASRYVHQLFHPDLHLQVHQQQQLHHHHHQQQQ |         |    |
| Prupe.3G173700.1 | MAG.....                        |                                              |         |    |
| Prupe.1G530300.1 | MKG.....                        | GYVDTKGGNSKHPSPT.....                        | NHRECQT |    |
| Prupe.1G034400.1 | MDS.....                        | AATNSAALN.....                               | KQRELEI |    |

|                  | 40                           | 50                 | 60                | 70                 |
|------------------|------------------------------|--------------------|-------------------|--------------------|
| Prupe.2G147000.1 | SEDEQN.....                  | SSGGGGLISRGIK..... | RD                | ENTSAATTSLLEG..... |
| Prupe.2G108200.1 | SDDDH.....                   | NTPNRNNLFSSDH..... | HQNDVD            | DDNPHHQGLDLV.....  |
| Prupe.2G239000.1 | QLDDHNTTNTPTNSSTSNPATTPNKQND | EHEDGRD            | NNDLEADNQDPN..... |                    |
| Prupe.8G182400.1 |                              |                    | LDPDP             |                    |
| Prupe.6G348200.1 | SMNNN.....                   | TTGTSSLGGSGGD..... | DDDD              | RDNNSDDPKE.....    |
| Prupe.4G266900.1 | ...DY.....                   | GGGVRAISLSQGG..... | RNSDD             | DGSSQHSPPRSASGGVVV |
| Prupe.5G037400.1 | SEDDA.....                   | VVNRSTGQFSAED..... |                   | HHQGLDLG.....      |
| Prupe.5G082200.1 | SEDEQ.....                   | TGSSGLNNKGQK.....  | RED               | IDNDSGGNGGDLG..... |
| Prupe.5G004600.1 | SDDSH.....                   |                    | HQDDQD            | HNNNKIESSDT.....   |
| Prupe.3G173700.1 | ...GADLPVPSVVSKTAIDRS.....   |                    | QDAD              | KSNSHHRPGIDA....I  |
| Prupe.1G530300.1 | SEERHPAATSSGTATVTNPSAQN      |                    |                   | KSSAAADPSNPS.....  |
| Prupe.1G034400.1 | SINEN.....                   | NSGRS.....         | SGGD              | EDRD               |

|                  | 80                | 90           | 100      | 110       |
|------------------|-------------------|--------------|----------|-----------|
| Prupe.2G147000.1 | .....KELG..       | STSAGEGEIT   | RRPGRRP  | AGSKNKA   |
| Prupe.2G108200.1 | .....             | TPNPGSGDSGG  | RRSRGRPP | CSRNKPKPP |
| Prupe.2G239000.1 | .....             | TGSG.SHD     | SLEPGSSN | RRPGRRP   |
| Prupe.8G182400.1 | .....             | PDAP.TNASPG  | APPSA    | RRPGRRP   |
| Prupe.6G348200.1 | .....             | GAI          | EVARRRP  | RRPGRRP   |
| Prupe.4G266900.1 | VGGGSSSSKSK.FVSP  | SGEIIIMS     | KKPRGRPP | CSRNKPKPP |
| Prupe.5G037400.1 | .....             | GINPGSGDIVA  | RRPGRRP  | CSRNKPKPP |
| Prupe.5G082200.1 | .....             | KELNVTISGGDG | SEMT     | RRPGRRP   |
| Prupe.5G004600.1 | .AATSSGGGGD.GDGG  | SGSGGPT      | RRPGRRP  | CSRNKPKPP |
| Prupe.3G173700.1 | LMAKLPKAVP.PISAAA | EGESI        | RRPGRRP  | CSRNKPKPP |
| Prupe.1G530300.1 | .....             | ADGATIEVI    | RRPGRRP  | CSRNKPKPP |
| Prupe.1G034400.1 | .....             | GAVEIGS      | RRPGRRP  | CSRNKPKPP |

|                  | 120  | 130 | 140 | 150    | 160       |
|------------------|------|-----|-----|--------|-----------|
| Prupe.2G147000.1 | VMEV | AN  | GD  | IMDSV  | S         |
| Prupe.2G108200.1 | ILEV | SS  | GD  | VFD    | SV        |
| Prupe.2G239000.1 | VLEI | SS  | GD  | IVDSI  | A         |
| Prupe.8G182400.1 | VLEV | SS  | GD  | IVDSLV | TYASRR    |
| Prupe.6G348200.1 | VMEI | SN  | ADI | ADSV   | ARFART    |
| Prupe.4G266900.1 | VLEI | SAG | SD  | VIEAII | QYARRR    |
| Prupe.5G037400.1 | ILEV | GN  | GD  | VFD    | CVATYARRR |
| Prupe.5G082200.1 | VMEV | AD  | GD  | DIVES  | ATFARRR   |
| Prupe.5G004600.1 | VLEI | SAG | AD  | IMESVS | IYARRR    |
| Prupe.3G173700.1 | AMEV | SS  | GD  | VSESL  | TNFARRK   |
| Prupe.1G530300.1 | ILEV | PG  | SD  | DIVEA  | VSRRFCCR  |
| Prupe.1G034400.1 | VMEV | AG  | AD  | VAESV  | AQFARRR   |

|                  | 170         | 180      | 190       |
|------------------|-------------|----------|-----------|
| Prupe.2G147000.1 | SVVTLHGRFEI | LSLSGSFL | PPPA      |
| Prupe.2G108200.1 | AVVTLHGRFEI | LSLTGSFL | PPPA      |
| Prupe.2G239000.1 | GVITLHGRFEI | LSLSGAFL | PSPS      |
| Prupe.8G182400.1 | TVVTLQGRFEI | LSITGTCL | PPPA      |
| Prupe.6G348200.1 | SVMALHGRFEI | LSLTGAFL | PGPA      |
| Prupe.4G266900.1 | LLSLHGRFEI  | LSLSGSFM | DAVPATATC |
| Prupe.5G037400.1 | SVVTLHGRFEI | LSLSGSFL | PPPA      |
| Prupe.5G082200.1 | SIVTLHGRFEI | LSLAGSFL | PPPA      |
| Prupe.5G004600.1 | SVVTLHGRFEI | LSLSGTVL | PPPA      |
| Prupe.3G173700.1 | AIVTLHGRFEI | LSLLGSIL | PPPA      |
| Prupe.1G530300.1 | ATVTFHGRFEI | LSISATFL | PQTT      |
| Prupe.1G034400.1 | AVVALQGRFEI | LSLSGAFL | PGPA      |

|                  | 200        | 210           | 220              | 230             | 240            |
|------------------|------------|---------------|------------------|-----------------|----------------|
| Prupe.2G147000.1 | LTIIYLAGV  | QGVVGGSVV     | CPLLASGPVVIMAASF | GNAA            | YERLPLEEEE     |
| Prupe.2G108200.1 | LTIFLAGGS  | QQVMGGNVV     | GALIASGPVIVIASSF | TNVAYERLPLEEEE  | QL....         |
| Prupe.2G239000.1 | LTIVYLAGG  | QGVVGGIVM     | GALVASGPMVVAATF  | TNATYERLPLEEDE  | QAGEGG.        |
| Prupe.8G182400.1 | LSIYLTGGQ  | QGVAGGIVV     | GPLRASGPVVLNVVS  | FAHAVYDRLPLEEEE | EKEPSA         |
| Prupe.6G348200.1 | MTIYLAGVQ  | QGVVGGSVV     | GPLVASGPMVIAATF  | SNATYERLPLEEEE  | EVGGN.         |
| Prupe.4G266900.1 | FGICLAGAQ  | QGVFGGIVGGKVV | AASAVVVVGATF     | VNPTVLERLPLPGD  | HD....         |
| Prupe.5G037400.1 | LTIFLAGVQ  | QGVVGGSVV     | CELTASGPVIVIASSF | TNVAYERLPLDEEE  | QL....         |
| Prupe.5G082200.1 | LTIIYLAGG  | QGVVGGSVV     | GTLIASGPVVIMAASF | SNAA            | YERLPLEEDE     |
| Prupe.5G004600.1 | LSIFLAGVQ  | QGVVGGCVV     | GPLLASGPVVLMAASF | GNAVFERLPLDDDE  | EGTPTG         |
| Prupe.3G173700.1 | LTIIYLAGAQ | QGVVGGSVV     | GALIASGPVVIMAASF | MNATFDRLPLEDEE  | VAAAL.         |
| Prupe.1G530300.1 | FTISLAGPQ  | GGQIVGGIVAG   | ALVAAGTVYVIAASF  | NNPSYHRLPGEDEA  | AVRNSGS        |
| Prupe.1G034400.1 | LTIVYLAAG  | NGQVVGGSVV    | GSLVAA           | GPVMVVAATF      | ANATYERLPLEEDE |

|                  | 250         | 260       | 270        | 280                           |
|------------------|-------------|-----------|------------|-------------------------------|
| Prupe.2G147000.1 | V.....      | QGS       | GPLGSP.GV  | GGQEHQQ.QSIQQQQQLLQDPNA       |
| Prupe.2G108200.1 | .....       | QMQQPV    | PQSSGG     | GGSGGG..GGGGVTNP.....FPDPSS   |
| Prupe.2G239000.1 | .....       | MQVQQQ    | QQQQQS     | GVNSA...GTGGNSGSQ.....GLVEHTS |
| Prupe.8G182400.1 | P.....      | RIQAPAA   | ASQSS      | GVTGGG..SGGDSYNL.....         |
| Prupe.6G348200.1 | .....       | NSGQAA    | GGGGSPP    | GI                            |
| Prupe.4G266900.1 | .....       | DHEN      | GVEGGAP... | AAEYEAQETKPGVNVESHCSVYGG      |
| Prupe.5G037400.1 | .....       | QVQVP...  | QGS        | GGSGGG..GV                    |
| Prupe.5G082200.1 | G.....      | GG        | GGSLGSPSGV | GHQQQQQ.HQQQQQQQLLAAEAAAN     |
| Prupe.5G004600.1 | GNGGGGGLQVQ | QP.TASQSS | GVTGGLGEGT | GGNSGGG.....                  |
| Prupe.3G173700.1 | .....       | QNQQ..... | .....      | YQNGRHHHLDI.....              |
| Prupe.1G530300.1 | G.....      | DAHSP...  | PLSG       | GVESGG.....HAP.....PSSQSC     |
| Prupe.1G034400.1 | G.....      | GHHNN     | GGSGNSP.TA | GGSSGAQLGSGGHQHQQQLPDPSS      |

|                  | 290          | 300         | 310                                     |
|------------------|--------------|-------------|-----------------------------------------|
| Prupe.2G147000.1 | P...SLFHGM   | PQSLN       | S...CQLF.AEGY....WG...TARPP...Y         |
| Prupe.2G108200.1 | G...LPFFNL   | LPLNNMP...  | HQLQ.VD.....SWGGN.SAGRPP...Y            |
| Prupe.2G239000.1 | S...MAIYN    | LPPNLLPN... | GQMP.PDV...WGPP..PPRPPPS.Y              |
| Prupe.8G182400.1 | .....        | GVTIS       | MGN...SGFP.GDVY...GWSSG...SSLP...K      |
| Prupe.6G348200.1 | G...VG VYN   | LQPNMLPN    | NGGQALS.HDQGAAYSSWAHGQGGGRAP...F        |
| Prupe.4G266900.1 | GG.....      | GVAS        | STPMNCQITSVF.DQVM...PWGPP...SRPP...Y    |
| Prupe.5G037400.1 | G...LPFFNL   | LPLNMQN...  | VQLF.ID.....GWAGNNSGGRPP...F            |
| Prupe.5G082200.1 | TNA...PLFHGL | LPPNLLNS... | MQLF.AEAAA...YWA...TGRPP...Y            |
| Prupe.5G004600.1 | .....        | AGLFNL      | LGGNMAAN...YPFSGPDLF...GWGGG.STPRPP...F |
| Prupe.3G173700.1 | .....        | SDLYGL      | LPPNLLTN...GNVP.PEVY...SWASGRTMSK...T   |
| Prupe.1G530300.1 | G...MSMYS... | .....       | CHLP.TDVL...WAPT..ARQPPPPPPY            |
| Prupe.1G034400.1 | GGLPNIYSHH   | LPPNLLIF    | NGGHGQLG.HEAY...AWA...RPP...Y           |
