# Supplementary material for: Dissection of AT-Hook Motif Nuclear-Localized Genes and Their Potential Functions in Peach Growth and Development
Source: MDPI journal article supplement (doi:10.3390/f14071404), 2023-07-10
Supplement: s1 [file s1]

|                  | 1                   | 10                  | 20                |
|------------------|---------------------|---------------------|-------------------|
| Prupe.2G167000.1 | .....MDRRD.....PMA  | LSG.SASYFTSRG.....  | LTQSGLHGS         |
| Prupe.5G037000.1 | .....MDSREVPQQQQPPP | PPQQQSMVGPSPSYQT... | SMPSNLPNSGPMGGP   |
| Prupe.5G098800.1 | .....MDGRE.....AMG  | LSG.SAQYYIHRGGVGGSM | PGS...QAGGLHTP    |
| Prupe.5G005600.1 | MSGSETGVMTSRB.....  | PFSVGLQKSLQSQAA...  | AIQNMRLLNFSPDGSAA |

|                  | 30         | 40             | 50         | 60          | 70          |                |
|------------------|------------|----------------|------------|-------------|-------------|----------------|
| Prupe.2G167000.1 | QGL...IHP  | LSNPNTAFQSN    | LGGGNI     | GSALP...IE  | PSSGITP...H | GVNVGVP        |
| Prupe.5G037000.1 | NPARFPFNAV | PPQPPQQQPTTSKP | QMDSLSP... | SPYDGS      | LRFCGSGG    | CFSIDSS...     |
| Prupe.5G098800.1 | PG...FRH   | MSNTVLQPPQSN   | VRVSV      | VGSTFS...VE | PS...REN    | FPHHGLSMNV     |
| Prupe.5G005600.1 | AALYKPVAAT | TSPTYQSAA      | AGGSA      | VPFLAAGEGSP | GAAVMA      | APAAAGLNMNM... |

|                  | 80             | 90 | 100     | 110   |
|------------------|----------------|----|---------|-------|
| Prupe.2G167000.1 | GEVVKRKRGRPRKY | GP | PDGTVSL | LS    |
| Prupe.5G037000.1 | ASAAKKKRGRPRKY | SP | PDGNIAL | LGLAP |
| Prupe.5G098800.1 | GEVVKRKRGRPRKY | GP | PDGTVSL | LS    |
| Prupe.5G005600.1 | SEPMKRKRGRPRKY | GP | PDGTVSL | LS    |

|                  | 120  | 130          | 140     | 150            | 160            | 170          |
|------------------|------|--------------|---------|----------------|----------------|--------------|
| Prupe.2G167000.1 | .KRG | RGRPPSGKKQL  | ASLG    | ELLSG          | SAGMGFTPHIITIA | MGEDIA       |
| Prupe.5G037000.1 | .KKN | RGRPPSGKKQL  | DALG... | AGGVGFTPHVIMVQ | AGEDIA         | AAKVMFS      |
| Prupe.5G098800.1 | .KRS | RGRPPSGRKQL  | ATLG    | DWMNT          | SAGLAFAPHVITIG | AGEDIA       |
| Prupe.5G005600.1 | IKA  | RGRPPSGTKKQL | DALG... | SVGF           | GFSPHVITVK     | AGEDVSAKIMFS |

|                  | 180               | 190   | 200         | 210           | 220    | 230        |
|------------------|-------------------|-------|-------------|---------------|--------|------------|
| Prupe.2G167000.1 | CILSANGAVSTVTLRQP | STSG  | GTVTYEGRFEI | ILCLSGSYLLTES | SGSRNR | TGGLSVSLAS |
| Prupe.5G037000.1 | CILSANGAICNVTLRQP | AMSG  | GTVTYEGRFEI | ILCLSGSYLLTES | SGSRNR | TGGLSVSLAG |
| Prupe.5G098800.1 | CILSGSGTASSVTLRQP | PASTG | SVTEGRFQIL  | CLSGSYLLVAED  | GGPRNR | TGGISVSLSS |
| Prupe.5G005600.1 | CILSANGAISNVTLRQP | ATSG  | GTVTYEGRFEI | ILCLSGSYLLTES | SGSRNR | TGGLSVSLSG |

|                  | 240                | 250         | 260      | 270             | 280     | 290     |
|------------------|--------------------|-------------|----------|-----------------|---------|---------|
| Prupe.2G167000.1 | PDGRVIGGGVGGMLIAAS | PPVQVIVGSFI | WSSSKTK  | SKKREAVEGATDLDH | QTV     | DNSVALN |
| Prupe.5G037000.1 | SDGQVLGGGVAGMLVAAS | PPVQVIVGSFI | ADGKKNS  | NFLKS..GPSSPPPS | QMLN    | FGAPM   |
| Prupe.5G098800.1 | PDGRVIGGAVA.MLIAAT | PPVQVIVGSFI | YGGSKTK  | NKQVAGPNSDENSEP | QH.NEKL | LALP    |
| Prupe.5G005600.1 | PDGRVIGGGVAGMLIAAS | PPVQVIVGSFI | ADGRKEPK | TTNQL..EPVAP... | KLAPSS  | GPT     |

|                  | 300          | 310       | 320            | 330        |
|------------------|--------------|-----------|----------------|------------|
| Prupe.2G167000.1 | SISQDQSLSDSA | SLAAWQAS  | RPLD....IR     | NTH.VDIDL  |
| Prupe.5G037000.1 | TAASPSSQGASS | ESSDENSGS | PLNRGPVLYNNAS. | QPIHNM     |
| Prupe.5G098800.1 | SNTPPTQNYNPS | GAGIWPGR  | QVD....LR      | NPH.TGIDL  |
| Prupe.5G005600.1 | GASSPQSRGTL  | LESSGGP   | GSPLNQSTGGCN   | NSNPQGMSSM |
