# Supplementary material for: Dissection of AT-Hook Motif Nuclear-Localized Genes and Their Potential Functions in Peach Growth and Development
Source: MDPI journal article supplement (doi:10.3390/f14071404), 2023-07-10
Supplement: s1 [file s1]

1 10 20 30 40 50  
Prupe. 2G146200.1 MEAKEGM.SSGV.RVGGVEAPSAYHGAPNAENPTRVAGMPVADVVSAMNVGVDGARVVRAE  
Prupe. 2G282300.1 MEKEDNL.VSGV.AVSGEAPDTYR.....TGTAATVT...ATNT  
Prupe. 6G347600.1 MEPENQ.LSSY....FQHPTTTTG.....TGTAAATVT...ATNT  
Prupe. 6G117900.1 MEENNMV.TTSQPPQ..TESKPNNEVE.....T.....  
Prupe. 5G081500.1 MEGRGEGVNSSGV.TVVASDAPSDYH.....  
Prupe. 7G119600.1 MEKEEST.FSGSPGNSGTESPPVTQM.....VNIPMGMD....VNMS

60 70 80 90 100 110  
Prupe. 2G146200.1 APSAYHGAPKTEDPTQVAGMPPAKVAETNV..GDDGATVKRKRGRPRKY...GPGGIVTM  
Prupe. 2G282300.1 ...IAPRNEPSPSGGPTMAAAATASPMSL..ALTGTEVKRKRGRPRKY...GPDKTIVSS  
Prupe. 6G347600.1 ASPTNGLLPNTHSTDGSHMVYSHSVPSAV..TSPLEPAKRKRGRPRKY...GTPEQALA  
Prupe. 6G117900.1 ...FMEPVQMNIEPNQD...LDQSGAPIGRVELTGTDTVVKRKRGRPRKYEMVGEEGNVVG  
Prupe. 5G081500.1 ...VAPRSENTHNAGSTPPAPVAPPAAALPAAASLPMKRKRGRPRKY...GPDGSVTM  
Prupe. 7G119600.1 SEITNNNSNPVSTTTTTETAEIAAAATV..GSGDLSGKRKRGRPRKY...DADGNLRL

120 130 140 150  
Prupe. 2G146200.1 A.....MSQMP.....GSPPASGTGGNLSSGVRGRGRGRGRGRGRGRGRGRGR  
Prupe. 2G282300.1 A.....LSPMP.....ISSSI..PLTGEFSAWKRGRGRV.....  
Prupe. 6G347600.1 A.....KKAAT.....TSSHS...SSSKEKDHHSASPSY.....  
Prupe. 6G117900.1 L.....VSASP.....STYS..GSYSELKVRGRGRK.....  
Prupe. 5G081500.1 A.....LSPKP.....ISSSAPPPVIDFSAEKVKVKT.....  
Prupe. 7G119600.1 GYNSNINKGGGVAPPPPGFYLSSPA.SEFSSSSSKRGRGRP.....

160 170 180 190 200 210  
Prupe. 2G146200.1 GWSDGSNAKQHEAPAMESGGDWSVVVTPSTDYTPHVIATAEPGEDLTFKIISVAEQGPRAI  
Prupe. 2G282300.1 ...DSVKKSHKYDVVFESSGEEK.IAYSVGANFTPHVLTVHAGEDVMTKIMSFSSQGSRAI  
Prupe. 6G347600.1 ...SGSTKKSQOF.....SLGNAGQGFTPHVLTVAAGEDVGQKIMFFMQSKREI  
Prupe. 6G117900.1 ...G....SGKLQLLSPRGGGLSVDPAGGGFYTOVLTAETGEDIVHKIISLSETNPNRSL  
Prupe. 5G081500.1 ...SSVSKT.KYEV.ENLGEW.VACSVGANFTPHIITVNSGEDVMMKIISFSSQGPRAI  
Prupe. 7G119600.1 ...G....SGNWQVLASLSEL.FANTAGDFTPHVVTVSTGEDVAGKIISFSSQKGPRAI

220 230 240 250 260 270  
Prupe. 2G146200.1 WIISANGAVSNVRLRRPDITDEGSTITLEGVFEIAHLSGSFMFYDNRGT..MSGGLSVSLSG  
Prupe. 2G282300.1 CILSANGTISNVTLRPPSSSGGTLTYBGRFEILSLSGSYIAIENAGTKSRSGGMSVALAG  
Prupe. 6G347600.1 CILSASGTISNASLRPPATSSGNTITYBGRFEIISLGSYVVRTDLG...RAGGLSVCLSS  
Prupe. 6G117900.1 CILTATGVVCSAVIROPPSSYTGILRFKGRFQILTLSGSFVYDATQNRGKNGMMLSVLCH  
Prupe. 5G081500.1 CVLSANGVISSVTLRPPSSSGTILTYBGRFEILSLSGSFMFPNETGTGTRSRSGGMSVSLAS  
Prupe. 7G119600.1 CVLSANGAVSNVTLRPPSSSGTILTYBGRFELLSSLSGSFTVTEIGGVNRRTGGLSVSLAG

280 290 300 310 320  
Prupe. 2G146200.1 PNGSCIGGAVCGSLIAAGHVQVVVGSFAPGKPDVLPKEVTNQNSGEPQ.....  
Prupe. 2G282300.1 PDGRVVGGGLAGMLIAAGPVQVVVGSFLPGHQEQKPKKQRLPEPVSSSI.....VP  
Prupe. 6G347600.1 TDGQIIGGGVGGPLKAAQPVQIVGTFTMVDAAKQDVTAGVKGDASATK.....LP  
Prupe. 6G117900.1 PDGNIFGGAVAGALIAAEVQIIATSELTQETSSNTSKELKRRHSAESSTSTSM LGN.SSC  
Prupe. 5G081500.1 PDGRVVGGVAGLLVAASPVQVVVGSFLSGNQHEQKPKKQKHDIISNA.....TP  
Prupe. 7G119600.1 PDGRVIGGGLAGLTAASPIQIVVGSFTPNGYKAHKRKHRENNVVASPIS....GSLDTV

330 340  
Prupe. 2G146200.1 .....PNLGSPPG.....QSENRAEPAS....  
Prupe. 2G282300.1 IVVNAAVSGEEMKVC GGVPKILTSPPF...HGNNSTSVNP...MHSFKNSAPESKS.LS  
Prupe. 6G347600.1 TAGEMMN.....VSFRSAVDSGRTL.VRGNDQQAIGGSHFMIQGMHVAPS RPTDWR  
Prupe. 6G117900.1 LAMVP LLMPPPTIVHDESCITSPITSALEFP SHSGAGNVIA...ANRNMNPATLP GFDQN  
Prupe. 5G081500.1 TMAVP IISVDPK.....PNFSSSTF...RGDNWSSL.....PSDPKTKT...  
Prupe. 7G119600.1 TVATPIISQAQPESESRLTTLSPLPAQ...SHGEADKIMI...QMQTSNAITSTSAV.WN

Prupe. 2G146200.1 .....  
Prupe. 2G282300.1 E.....EESKGPQG..PNCEVSY.....  
Prupe. 6G347600.1 GGPDARGTGAYELTGRAGRAAHQSPENG DYDQIPD.....  
Prupe. 6G117900.1 A.....LQMPDPPTTSPHIDTFIP.....  
Prupe. 5G081500.1 .....DINVS LPPGGVI.....  
Prupe. 7G119600.1 G.....TELKSEHRSPDINVSVP GVSVTGE
